# Supplementary material for: Diet Advice for Crohn’s Disease: FODMAP and Beyond
Source: PubMed Central journal article supplement (PMC7762196; doi:10.3390/nu12123751), 2020-12-06
Supplement: nutrients-12-03751-s001.pdf [file nutrients-12-03751-s001.pdf]

**Table S1.** Studies Assessing the Outcomes after LFD and other types of diet in CD patients.

| First Author               | Publication Year | Country   | Study Design                                                                 | Total Patients | Mean Age (years) (mean $\pm$ SD) / (Range) | Diagnosis                                                                                                                                                                                                                       | Sex (%Male)            | Main Findings                                                                                                                                                                        |
|----------------------------|------------------|-----------|------------------------------------------------------------------------------|----------------|--------------------------------------------|---------------------------------------------------------------------------------------------------------------------------------------------------------------------------------------------------------------------------------|------------------------|--------------------------------------------------------------------------------------------------------------------------------------------------------------------------------------|
| Gearry RB et al. [34]      | 2009             | Australia | Retrospective questionnaire-based study                                      | 72             | 48 (18–72)                                 | 52—Crohn’s disease<br>20—ulcerative colitis                                                                                                                                                                                     | 45.83%                 | Reduction in FODMAP intake was an efficacious strategy for patients with IBD.                                                                                                        |
| Cox SR et al. [35]         | 2020             | UK        | Multicenter, randomized, parallel, single-blinded, placebo-controlled trial  | 52             | 36 $\pm$ 12                                | Quiescent Crohn’s disease or ulcerative colitis and persistent gut symptoms Rome III criteria                                                                                                                                   | 44.23%                 | The low-FODMAP diet reduced fecal microbial abundance without significant effect on inflammation markers. Patients with quiescent IBD can benefit from a 4-week diet low in FODMAPs. |
| Halmos EP et al. [36]      | 2016             | Australia | Randomized, controlled, blinded, cross-over trial                            | 8              | 35 (29–41)                                 | Clinically quiescent Crohn’s disease Harvey-Bradshaw Index of $\leq$ 5                                                                                                                                                          | 25%                    | Altering dietary FODMAP intake is associated with changes similar to a prebiotic effect on the gut.                                                                                  |
| Elhousseiny MH et al. [37] | 2018             | Egypt     | Cross-sectional interventional                                               | 100            | 28.56 $\pm$ 7.0                            | Crohn’s disease in remission C-reactive protein (CRP) (<3 mg/L), fecal calprotectin (<100 $\mu$ g/g), Crohn’s disease activity index (CDAI) below 150 points, and normal findings by computed tomography and endoscopic reports | 42%                    | The low-FODMAP diet was effective in improving the quality of life of CD patients with FGID.                                                                                         |
| Cox SR et al. [38]         | 2017             | UK        | Randomized, double-blind, placebo-controlled, cross-over, re-challenge trial | 29             | 39 $\pm$ 19.5                              | IBD: Crohn’s disease (12), ulcerative colitis (17)                                                                                                                                                                              | 34.4%                  | At high doses, fructans exacerbated FGS compared to GOS or sorbitol, in quiescent IBD patients.                                                                                      |
| Benjamin JL et al. [39]    | 2011             | UK        | Randomized, double-blind, placebo-controlled trial                           | 103            | FOS 40 $\pm$ 14.8<br>Placebo 39 $\pm$ 13.7 | Crohn’s disease                                                                                                                                                                                                                 | FOS 33%<br>Placebo 45% | In patients with active Crohn’s disease FOS presented with no clinical benefit.                                                                                                      |
| Prince AC et al. [40]      | 2016             | UK        | Cross-sectional interventional                                               | 88             | 40 $\pm$ 13                                | IBD: Crohn’s disease (39), ulcerative colitis (38) IBD-u (11)                                                                                                                                                                   | 30%                    | The low-FODMAP diet was effective in improving FGS in IBD.                                                                                                                           |

|                             |      |             |                                           |       |                                                                     |                                                                                                  |        |                                                                                                                                        |
|-----------------------------|------|-------------|-------------------------------------------|-------|---------------------------------------------------------------------|--------------------------------------------------------------------------------------------------|--------|----------------------------------------------------------------------------------------------------------------------------------------|
| de Castro MM et al. [41]    | 2020 | Brazil      | Cross-sectional interventional            | 60    | 18–60                                                               | Crohn's disease—endoscopic, radiological, and histological criteria                              | 51.7%  | Three dietary patterns were identified: "Traditional + FODMAP", "Fitness style" and "Snacks and processed foods".                      |
| Lindsay JO et al. [42]      | 2006 | UK          | Open-label trial                          | 10    | 40 (29–56)                                                          | Moderately active colonic or ileocolonic Crohn's disease Harvey–Bradshaw Index (HBI) >5          | 80%    | FOS supplementation increases fecal bifidobacteria concentrations and decreases Crohn's disease activity.                              |
| Khalili H et al. [16]       | 2020 | Sweden      | Population-based prospective cohort study | 83147 | 45–79                                                               | Crohn's disease, ulcerative colitis                                                              | 55.21% | Significantly lower risk of late onset CD was obtained with greater adherence to MD.                                                   |
| Papada E et al. [17]        | 2020 | Greece      | Cross-sectional                           | 86    | Active disease 41.5 ± 16.5<br>Inactive disease 37.4 ± 11.5          | Crohn's disease —relapse (5 ≤ Harvey–Bradshaw Index ≤ 14) —remission (Harvey–Bradshaw Index ≤ 4) | 64.9%  | Higher quality of life in CD patients is achieved with adherence to MD.                                                                |
| Chicco F et al. [18]        | 2020 | Italy       | Prospective, interventional study         | 142   | Crohn's disease 48 (34.8–57.5)<br>Ulcerative colitis 52 (44.5–61.3) | Crohn's disease, ulcerative colitis                                                              | 53.5%  | MD was associated with a spontaneous improvement of disease activity in IBD.                                                           |
| Taylor L et al. [43]        | 2018 | Canada      | Single center cross-sectional study       | 67    | 45                                                                  | Crohn's disease clinical, radiological, and endoscopic criteria Harvey–Bradshaw Index (HBI) <5   | 50.74% | Patients with CD reported a more restricted nutrient intake. P-MDS is an effective tool to identify pro-inflammatory dietary patterns. |
| Marlow G et al. [44]        | 2013 | New Zealand | Cross-sectional                           | 8     | 45.4 (31–60)                                                        | Crohn's disease                                                                                  | 25%    | Mediterranean-inspired diet reduced markers of inflammation and normalized the microbiota of CD patients.                              |
| Schreiner P et al. [45]     | 2019 | Switzerland | Population-based cohort study             | 1254  | Not vegetarian 29.6 (21.7–39.6),<br>Vegetarian 28.1 (20.6–35.8)     | Crohn's disease, ulcerative colitis                                                              | 52.47% | Patients on a VD or GFD had significantly lower psychological well-being.                                                              |
| Chiba M et al. [46]         | 2010 | Japan       | Prospective clinical trial                | 22    | 26.5 (19–77)                                                        | Crohn's disease                                                                                  | 63.63% | SVD prevented relapse in CD.                                                                                                           |
| Gudmand-Hoyer E et al. [19] | 1970 | Denmark     | Cross-sectional                           | 156   | -                                                                   | Crohn's disease, ulcerative colitis                                                              | 41.6%  | Lactose malabsorption is not common in IBD patients. If present, lactose intolerance is not related to IBD.                            |

---

|                           |      |       |                       |    |           |                    |     |                                                                                                                                                         |
|---------------------------|------|-------|-----------------------|----|-----------|--------------------|-----|---------------------------------------------------------------------------------------------------------------------------------------------------------|
| Capristo E<br>et al. [20] | 2000 | Italy | Case-control<br>study | 40 | 26.6–42.4 | Crohn's<br>disease | 50% | Polymeric enteral<br>diet rich in<br>vegetable protein,<br>without milk<br>protein,<br>significantly<br>improved body<br>composition in CD<br>patients. |
|---------------------------|------|-------|-----------------------|----|-----------|--------------------|-----|---------------------------------------------------------------------------------------------------------------------------------------------------------|

---

IBS—irritable bowel syndrome, CD—Crohn's disease, HFM—high-FODMAP diet, LFM—low-FODMAP diet, LPS—lipopolysaccharides, FGID—functional gastrointestinal disease, GOS—galacto-oligosaccharides, FGS—functional gastrointestinal symptoms, IBD—inflammatory bowel disease, FOS—fructo-oligosaccharides, MD—Mediterranean diet, P-MDS—Mediterranean diet scores, VD—vegetarian diet, GFD—gluten-free diet, SVD—semi-vegetarian diet.
